# Supplementary material for: Structural and Genetic Identification of the O-Antigen from an Escherichia coli Isolate, SD2019180, Representing a Novel Serogroup
Source: MDPI journal article supplement (doi:10.3390/ijms242015040), 2023-10-10
Supplement: s1 [file s1]

**Table S2.** Strains, plasmids, and primers used in this study.

| Strain/plasmid/primer             | Description                                                                                                     |
|-----------------------------------|-----------------------------------------------------------------------------------------------------------------|
| Bacterial strain                  |                                                                                                                 |
| EPEC025                           | Wild-type strain                                                                                                |
| EPEC025 $\Delta$ wzy              | Deletion of EPEC025 <i>wzy</i> gene                                                                             |
| EPEC025 $\Delta$ wzy:: <i>wzy</i> | EPEC025 $\Delta$ wzy complemented with pBD33- <i>wzy</i>                                                        |
| Plasmid                           |                                                                                                                 |
| pRE112                            | Allelic exchange vector with <i>sacB</i> , chloramphenicol resistant                                            |
| pRE112-updown                     | pRE112 fused with EPEC025 <i>wzy</i> up- and down- homologous sequences                                         |
| pBD33                             | Expression vector with chloramphenicol selection                                                                |
| pBD33- <i>wzy</i>                 | pBD33 inserted with EPEC025 <i>wzy</i> plus Shine-Dalgarno box                                                  |
| Primer                            | Nucleotide sequences (5'-3') <sup>a</sup>                                                                       |
| 112F                              | CATCGTATTTCTGGTGCGTACCCTGATAAATGCTTCAATAATGG, forward primer for pRE112 linearization                           |
| 112R                              | ATTGCGGCTAAAGCGTTAGTCAACAGCTCATTTTCAGAAATGG, reverse primer for pRE112 linearization                            |
| upF                               | CCATTATTGAAGCATTATCAGGGTACGCACCAGAAATACGATG, forward primer for <i>wzy</i> upload sequence                      |
| upR                               | AACTCTTGATACCAGCGGAGGTATCGCATAGCCAACA, reverse primer for <i>wzy</i> upload sequence                            |
| downF                             | TGTTGGCTATGCGATACCTCCGCTGGTATCAAGAGTT, forward primer for <i>wzy</i> download sequence                          |
| downR                             | CCATTCTGAAATGAGCTGTTGACTAACGCTTTAGCCGCAAT, reverse primer for <i>wzy</i> download sequence                      |
| wzycF                             | CGGGGTACC <b>AGGAGG</b> AAAAATGAAAAGAAATTTTATATACTGT, forward primer for <i>wzy</i> cloning, digested with KpnI |
| wzycR                             | CCCAAGCTTTTAATTGGCAAGATTAATCCT, reverse primer for <i>wzy</i> cloning, digested with HindIII                    |

<sup>a</sup> Boldface characters indicate Shine-Dalgarno box and restriction sites are italic.
