# Supplementary material for: Structural and Genetic Identification of the O-Antigen from an Escherichia coli Isolate, SD2019180, Representing a Novel Serogroup
Source: MDPI journal article supplement (doi:10.3390/ijms242015040), 2023-10-10
Supplement: s1 [file s1]

**Table S1.** Comparison of  $^1\text{H}$  and  $^{13}\text{C}$  NMR chemical shifts between the O-specific polysaccharide from the *E. coli* strain SD2019180 and the DPS of *E. coli* O9:K33:H-.

| Residue          |                  | Chemical shifts (ppm) |           |           |           |           |                 |
|------------------|------------------|-----------------------|-----------|-----------|-----------|-----------|-----------------|
|                  |                  | 1-H/1-C               | 2-H/2-C   | 3-H/3-C   | 4-H/4-C   | 5-H/5-C   | 6-H/6-C         |
| $\alpha$ -D-Galp | SD2019180        |                       |           |           |           |           |                 |
|                  | O-antigen        | 5.23/100.0            | 3.74/68.9 | 3.82/69.2 | 3.69/69.6 | 4.06/71.3 | 3.68, 3.70/61.7 |
|                  | O9:K33:H-<br>DPS | 5.26/101.3            | 3.78/69.6 | 3.91/70.2 | 4.01/70.6 | 4.15/72.2 | 3.72, 3.72/62.6 |
| $\alpha$ -L-Fucp | SD2019180        |                       |           |           |           |           |                 |
|                  | O-antigen        | 5.05/99.8             | 3.95/67.9 | 4.02/73.9 | 4.14/80.1 | 4.42/67.5 | 1.30/15.2       |
|                  | O9:K33:H-<br>DPS | 5.29/100.2            | 4.05/69.4 | 4.05/75.6 | 4.11/81.2 | 4.41/68.4 | 1.31/16.2       |
| $\beta$ -D-GlcpA | SD2019180        |                       |           |           |           |           |                 |
|                  | O-antigen        | 4.65/103.7            | 3.45/73.3 | 3.57/75.2 | 3.63/71.3 | 3.98/75.8 | -/169.0         |
|                  | O9:K33:H-<br>DPS | 4.55/104.5            | 3.46/75.5 | 3.79/76.9 | 3.88/78.7 | 3.76/78.4 | -/174.9         |
